# Supplementary material for: Antibodies to FXa and thrombin in patients with SLE differentially regulate C3 and C5 cleavage
Source: PubMed Central journal article supplement (PMC9422842; doi:10.1136/lupus-2022-000738), 2022-08-25

A

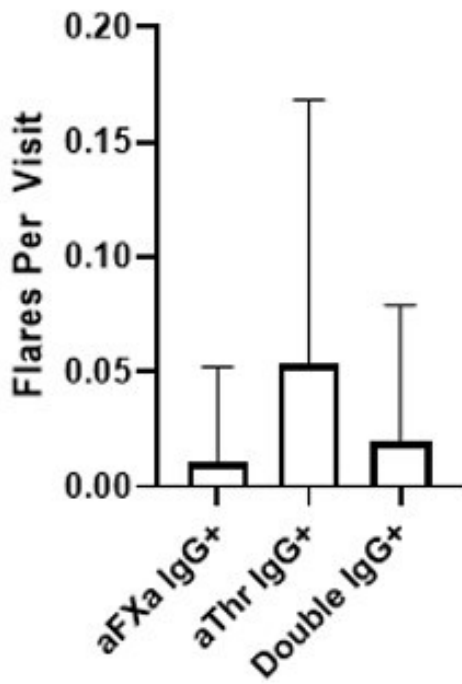

B

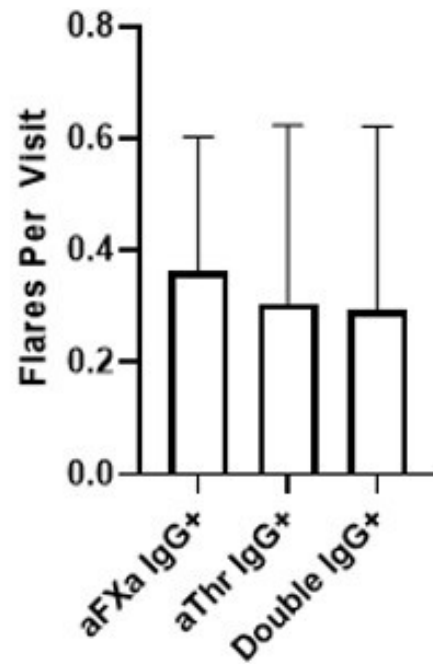

C

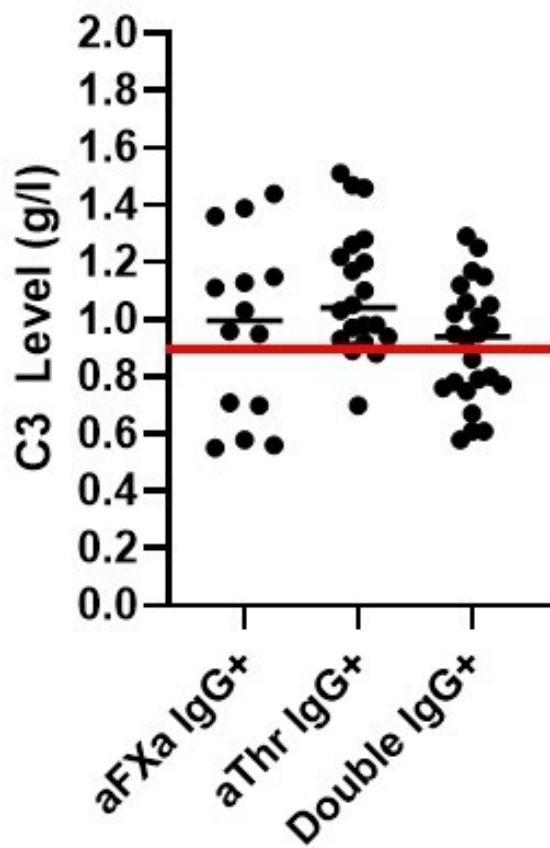

D

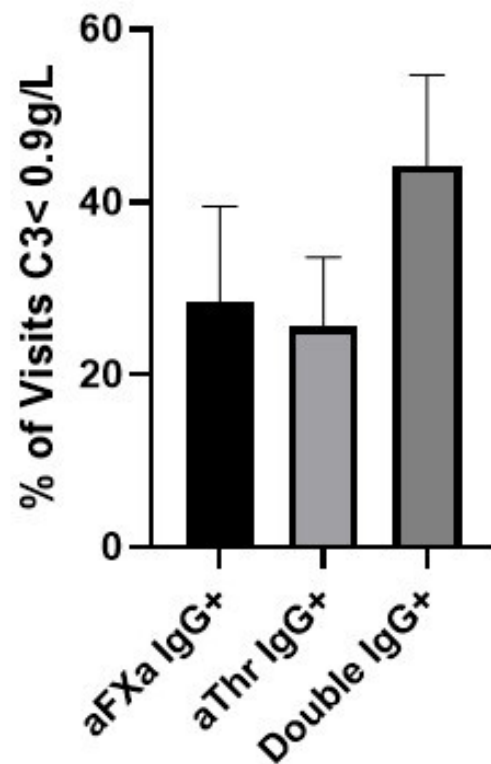

Supplement: lupus-2022-000738supp001.pdf [file lupus-2022-000738supp001.pdf]
