# Supplementary material for: Antibodies to FXa and thrombin in patients with SLE differentially regulate C3 and C5 cleavage
Source: PubMed Central journal article supplement (PMC9422842; doi:10.1136/lupus-2022-000738), 2022-08-25
Supplement: lupus-2022-000738supp002.pdf [file lupus-2022-000738supp002.pdf]

## Tables

|                                          | <b>SLE/APS</b>                                                                               |
|------------------------------------------|----------------------------------------------------------------------------------------------|
| <i>Age (SD)</i>                          | 46.29 (12.46)                                                                                |
| <i>Sex Female (Male)</i>                 | 55 (3)                                                                                       |
| <i>Manifestations SLE, (n)</i>           | Mucocutaneous (54),<br>CNS (7),<br>Renal (17),<br>Haem (3),<br>Joint (57),<br>Serositis (16) |
| <i>Manifestations APS, (n)</i>           | VT (4),<br>PM (2),<br>CVA (2)                                                                |
| <i>aCL, n (mean, SD)</i>                 | 8 (17.91, 42.03)                                                                             |
| <i>Anti-β2GPI, n (mean, SD)</i>          | 3 (14.15, 9.87)                                                                              |
| <i>LA positive, n</i>                    | 16                                                                                           |
| <i>Other autoantibody positivity (n)</i> | aDNA (39),<br>Sm (12),<br>RNP (24),<br>Ro (28),<br>La (3),<br>RF (9),                        |
| <i>aFXa, n (mean +/- SD)</i>             | 38 (21.20, 16.67)                                                                            |
| <i>aThr, n (mean +/- SD)</i>             | 44 (32.43, 26.20)                                                                            |

Supplimentary Table 1. Patient demographics of n=58 clinical associations cohort
